# Supplementary material for: Sea Buckthorn and Grape Antioxidant Effects in Hyperlipidemic Rats: Relationship with the Atorvastatin Therapy
Source: Evid Based Complement Alternat Med. 2020 Jun 22;2020:1736803. doi: 10.1155/2020/1736803 (PMC7327606; doi:10.1155/2020/1736803)
Supplement: Supplementary Materials — Table S1. Heart tissue, TAC in experimental groups after 60 and 180 days of treatment. Table S2. Liver tissue, TAC in experimental groups after 60 and 180 days of treatment. Table S3. Kidney tissue, TAC in experimental groups after 60 and 180 days of treatment. Table S4. Liver cytoarchitecture in experimental groups after 60 and 180 days of treatment. Table S5. Kidney cytoarchitecture in experimental groups after 60 and 180 days of treatment. Figure S1. The total content analyze by HPLC (Shimadzu, Japan) of sea buckthorn berries revealed different structures like polyphenol, coumaric acid, butin, rosmarinic acid, resveratrol, kaempferol and quenotin. [file 1736803.f1.zip]

Archive with 2 entries (2 files):
- 1736803.f1/mat.1736803.v3.docx
- 1736803.f1/Supplementary Figure_1_ECAM_ECAM_3096538.eps
